Development 136, 1397 (2009) doi:10.1242/dev.036780

## Definitive hematopoietic stem/progenitor cells manifest distinct differentiation output in the zebrafish VDA and PBI

Hao Jin, Raman Sood, Jin Xu, Fenghua Zhen, Milton A. English, P. Paul Liu and Zilong Wen

A processing error occurred when the full text HTML for *Development* 136, 647-654 was produced.

Throughout the full text version the alpha symbol in *α1-globin* was converted to β, thus in all cases '*βe1-globin*' should read '*αe1-globin*'.

The full text has now been corrected. The PDF and print copy are correct.

We apologise to authors and readers for this mistake.
